# Supplementary material for: Al2O3 buffer-facilitated epitaxial growth of high-quality ZnO/ZnS core/shell nanorod arrays
Source: Royal Society of Chemistry journal article supplement (doi:10.1039/d1nr02613e), 2021-01-01
Supplement: d1nr02613e1.pdf [file d1nr02613e1.pdf]

## Supporting Information

# Al<sub>2</sub>O<sub>3</sub> Buffer-Facilitated Epitaxial Growth of High-Quality ZnO/ZnS Core/Shell Nanorod Arrays

*Fan Ru, <sup>a, b</sup> Jing Xia, \*<sup>a</sup> Xuanze Li<sup>a</sup>, Yifan Wang, <sup>a, b</sup> Ze Hua, <sup>c</sup> Ruiwen Shao<sup>d</sup>, Xuecong Wang,<sup>a</sup> Chun-Sing Lee,<sup>e</sup> Xiang-Min Meng\*<sup>a</sup>*

<sup>a</sup>Key Laboratory of Photochemical Conversion and Optoelectronic Materials, Technical Institute of Physics and Chemistry, Chinese Academy of Sciences, Beijing, 100190, P. R. China.

E-mail of corresponding author: mengxiangmin@mail.ipc.ac.cn; xiajing@mail.ipc.ac.cn;

<sup>b</sup>Centre of Material Science and Optoelectronic Engineering, University of Chinese Academy of Science, Beijing, 10049, P. R. China.

<sup>c</sup>Analysis & Testing Center, Beijing Institute of Technology, Beijing, 102488, P. R. China.

<sup>d</sup>Beijing Advanced Innovation Center for Intelligent Robots and Systems and Institute of Convergence in Medicine and Engineering, Beijing Institute of Technology, Beijing 100081, P. R. China

<sup>e</sup>Center of Super-Diamond and Advanced Films (COSADF) and Department of Chemistry, City University of Hong Kong SAR, P.R. China.

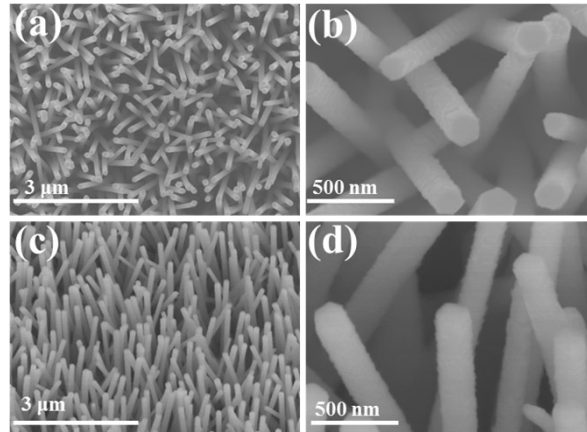

**Fig. S1.** (a,b) Top-view and (c,d) tilt view of low- and high-magnification SEM images of the ZnO/ZnS core/shell nanorod arrays without Al<sub>2</sub>O<sub>3</sub> buffer layer.

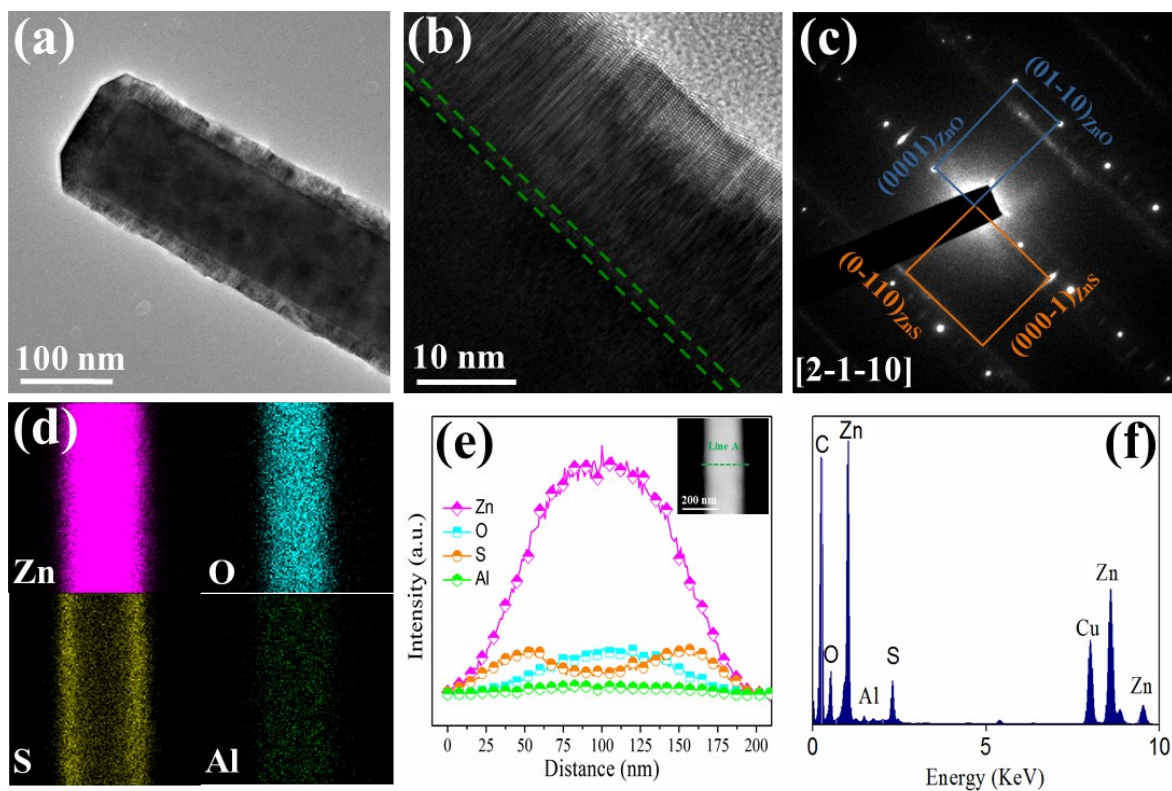

**Fig. S2** (a) TEM image of the ZnO/ZnS core/shell nanorods with 2 nm  $\text{Al}_2\text{O}_3$  as buffer layer. (b) Corresponding SAED pattern and (c) HRTEM image of (a). (d) ADF-STEM image and corresponding elemental mappings of the core/shell nanorod. (e) EDS line scan data from the core/shell heterostructure. (f) EDS line scan data corresponding to line A. The thickness of the  $\text{Al}_2\text{O}_3$  is 1 nm.

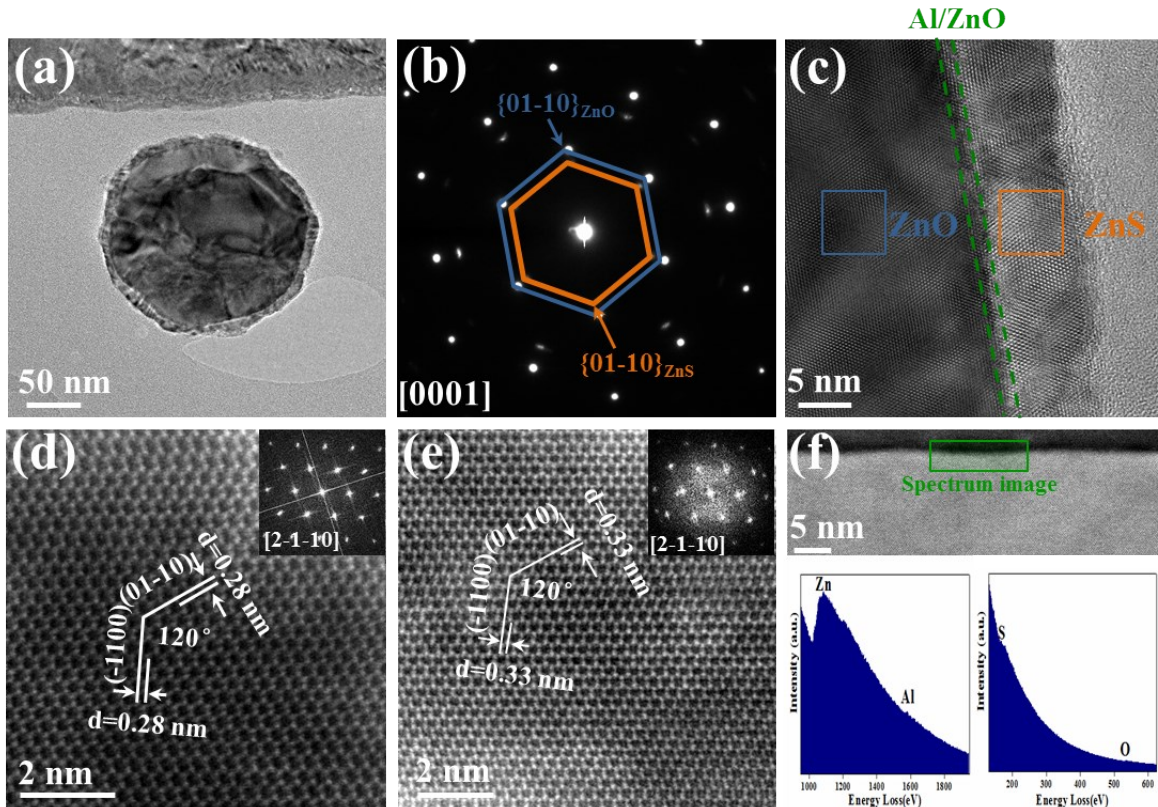

**Fig. S3** (a) TEM image of the cross-section sample. (b) Corresponding SAED pattern and (c) HRTEM image of (a), respectively. (d) and (e) Enlarged HRTEM images recorded from regions i and ii in (c), respectively. (f) ADF image with spectrum image of the core/shell heterostructure and EELS spectra obtained from the spectrum image.

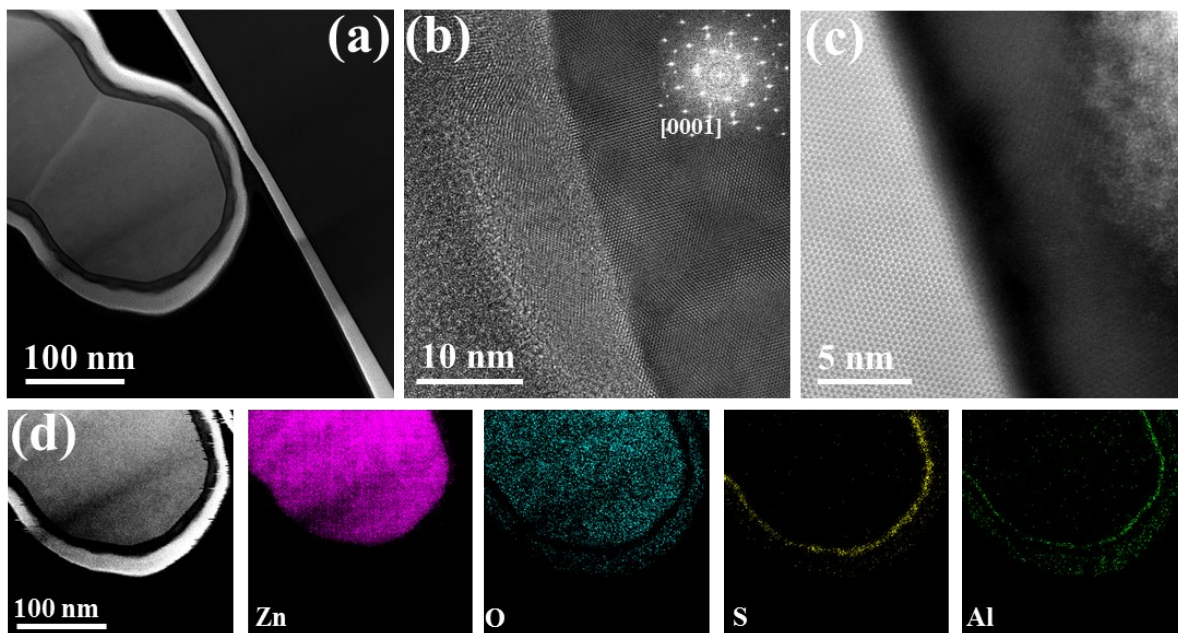

**Fig. S4** (a) TEM image of the cross-section sample. (b) Corresponding HRTEM and ADF-STEM images of (a), inset is the corresponding SAED pattern. (d) ADF image and corresponding elemental mappings of the core/shell heterostructure.

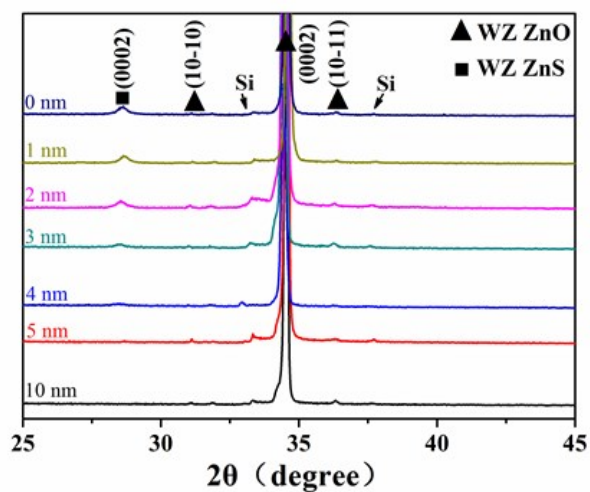

**Fig. S5** XRD patterns of ZnO/ZnS core/shell nanorod arrays with different thicknesses of  $\text{Al}_2\text{O}_3$  as buffer layer.

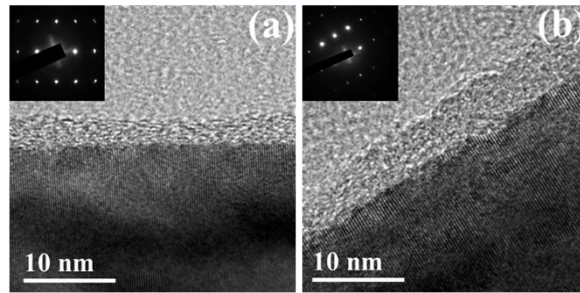

**Fig. S6.** HRTEM images of the obtained (a) 2 nm and (b) 4 nm Al<sub>2</sub>O<sub>3</sub>-coated ZnO after heating, insets are corresponding SAED patterns.

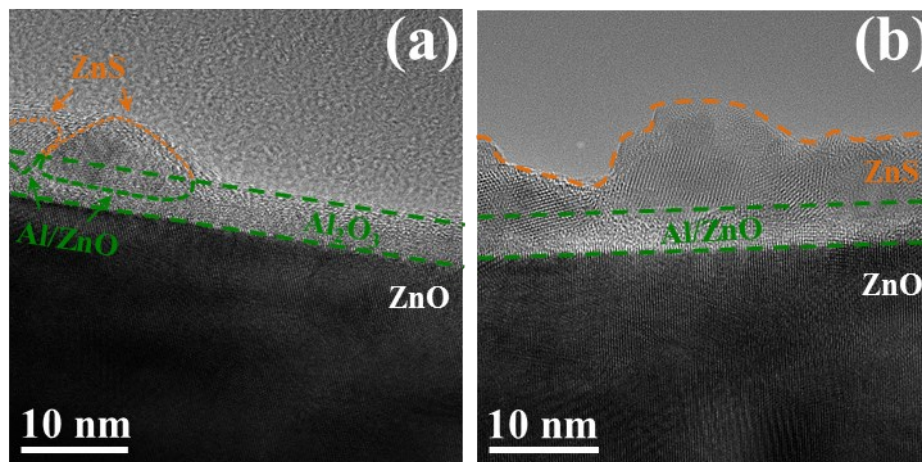

**Fig. S7.** (a-d) HRTEM images of the obtained core-shell heterostructures (4 nm Al<sub>2</sub>O<sub>3</sub> as buffer layer) at different growth stages. Note: the heterostructures shown in (a-d) were not recorded from the same one.

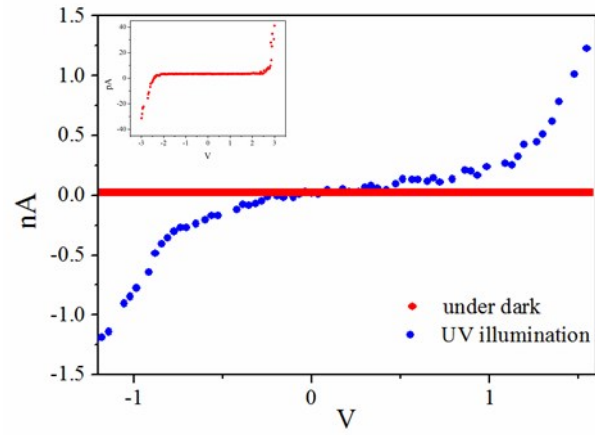

**Fig. S8.** I–V curves of diode consisting of core/shell heterostructure without  $\text{Al}_2\text{O}_3$  in the dark (red) and in the presence of 365 nm illumination (blue), respectively.
